# Supplementary material for: Human-Biting Ixodes scapularis Submissions to a Crowd-Funded Tick Testing Program Correlate with the Incidence of Rare Tick-Borne Disease: A Seven-Year Retrospective Study of Anaplasmosis and Babesiosis in Massachusetts
Source: MDPI journal article supplement (doi:10.3390/microorganisms11061418), 2023-05-27
Supplement: s1 [file s1]

Table S1: Molecular methods used for the identification of *Ixodes scapularis* ticks and the detection of *Babesia microti* and *Anaplasma phagocytophilum*.

| Target gene | Application                             | Type    | Sequences (5'-3')              | T <sub>m</sub> (C) |
|-------------|-----------------------------------------|---------|--------------------------------|--------------------|
| ITS         | <i>Ixodes scapularis</i> identification | Forward | TGCGTTTTCTTTGAGCAAATGCACGAG    | 60                 |
|             |                                         | Reverse | GTACGGGATTTTCCACAAACGGTATCCA   |                    |
|             |                                         | Probe   | TGCGCTTAACCAGTCCTCCTCCTCCTACGA |                    |
| Tubulin     | <i>Babesia</i> detection                | Forward | GATTTGGAACCTGGCACCATG          | 60                 |
|             |                                         | Reverse | AATGACCCTTAGCCCAATTATTTCC      |                    |
|             |                                         | Probe   | ATCTGGCCCATACGGTGAATTGTTTCGC   |                    |
| MSP-2       | <i>Anaplasma</i> detection              | Forward | ATGGAAGGTAGTGTGGTTATGGTATT     | 60                 |
|             |                                         | Reverse | TTGGTCTTGAAGCGCTCGTA           |                    |
|             |                                         | Probe   | TGGTGCCAGGGTTGAGCTTGAGATTG     |                    |

Table S2. Characteristics of tick attachment.

|                                                               | Larvae | Nymphs | Adults |
|---------------------------------------------------------------|--------|--------|--------|
| Mean attachment time to victim (hours)                        | 17.33  | 17.28  | 20.98  |
| Engorgement rate, percentage of ticks (laboratory determined) | 9.77   | 10.80  | 10.00  |
| Mean age of victim (years)                                    | 26     | 34     | 41     |
| Reported attachment location (percentage of ticks):           |        |        |        |
| Arm, armpit, back, chest, ear, head, neck, shoulder, stomach  | 44.9   | 49.1   | 62.5   |
| Buttocks, groin, foot, leg, knee                              | 48.2   | 41.1   | 28.3   |
| Other, not provided                                           | 6.9    | 9.8    | 9.2    |

Table S3: Spearman's rho with 95% confidence intervals for correlations between tick measures and human disease.

|                    | 2015                   | 2016                   | 2017                   | 2018                   | 2019                    | 2020                   | 2021                   | aggregated             |
|--------------------|------------------------|------------------------|------------------------|------------------------|-------------------------|------------------------|------------------------|------------------------|
| Human anaplasmosis |                        |                        |                        |                        |                         |                        |                        |                        |
| All sub            | 0.655<br>[0.544,0.729] | 0.668<br>[0.575,0.744] | 0.622<br>[0.537,0.695] | 0.678<br>[0.620,0.741] | 0.625<br>[0.540,0.697]  | 0.695<br>[0.622,0.755] | 0.720<br>[0.651,0.778] | 0.830<br>[0.800,0.856] |
| Inf sub            | 0.541<br>[0.309,0.711] | 0.672<br>[0.476,0.805] | 0.590<br>[0.419,0.721] | 0.683<br>[0.554,0.780] | 0.722<br>[0.597,0.812]  | 0.707<br>[0.599,0.790] | 0.650<br>[0.477,0.775] | 0.732<br>[0.665,0.789] |
| adult              | 0.700<br>[0.603,0.777] | 0.727<br>[0.640,0.795] | 0.625<br>[0.536,0.700] | 0.688<br>[0.613,0.751] | 0.670<br>[0.590,0.737]  | 0.701<br>[0.629,0.761] | 0.728<br>[0.656,0.789] | 0.713<br>[0.654,0.764] |
| Nymph              | 0.791<br>[0.732,0.838] | 0.622<br>[0.465,0.741] | 0.617<br>[0.490,0.718] | 0.660<br>[0.555,0.744] | 0.735,<br>[0.647,0.803] | 0.684<br>[0.582,0.764] | 0.759<br>[0.678,0.821] | 0.708<br>[0.643,0.762] |
| Human babesiosis   |                        |                        |                        |                        |                         |                        |                        |                        |
| All sub            | 0.584<br>[0.454,0.690] | 0.667<br>[0.548,0.759] | 0.594<br>[0.480,0.689] | 0.634<br>[0.531,0.728] | 0.633<br>[0.531,0.717]  | 0.614<br>[0.500,0.706] | 0.712<br>[0.631,0.786] | 0.597<br>[0.515,0.667] |
| Inf sub            | 0.773<br>[0.656,0.889] | 0.407<br>[0.06,0.664]  | 0.642<br>[0.456,0.774] | 0.722<br>[0.563,0.823] | 0.517<br>[0.322,0.670]  | 0.609<br>[0.434,0.740] | 0.710<br>[0.505,0.834] | 0.584<br>[0.485,0.669] |
| adult              | 0.591<br>[0.455,0.700] | 0.596<br>[0.461,0.704] | 0.586<br>[0.473,0.680] | 0.581<br>[0.469,0.675] | 0.567<br>[0.457,0.660]  | 0.580<br>[0.471,0.672] | 0.684<br>[0.592,0.758] | 0.552<br>[0.465,0.629] |
| Nymph              | 0.661<br>[0.502,0.776] | 0.644<br>[0.460,0.775] | 0.667<br>[0.536,0.767] | 0.753<br>[0.680,0.810] | 0.675<br>[0.560,0.765]  | 0.722<br>[0.613,0.803] | 0.753<br>[0.650,0.838] | 0.684<br>[0.611,0.745] |
